# Supplementary material for: N-doped TiO2nanotubes/N-doped graphene nanosheets composites as high performance anode materials in lithium-ion battery
Source: Royal Society of Chemistry journal article supplement (doi:10.1039/c4ta02890b), 2014-07-25
Supplement: c4ta02890b1.pdf [file c4ta02890b1.pdf]

## Electronic Supplementary Information

# N-doped TiO<sub>2</sub> nanotubes/N-doped graphene nanosheets composites as high performance anode materials in lithium ion Battery

Yueming Li\*<sup>§</sup>, Zhiguang Wang<sup>§</sup>, Xiao-Jun Lv\*<sup>‡</sup>

<sup>§</sup> State Key Laboratory of Metastable Materials Science and Technology, College of Materials Science and Engineering, Yanshan University, Qinhuangdao, Hebei Province, 066004, China

<sup>‡</sup> Key Laboratory of Photochemical Conversion and Optoelectronic Materials and HKU-CAS Joint Laboratory on New Materials, Technical Institute of Physics and Chemistry, Chinese Academy of Sciences, Beijing 100190, P.R. China

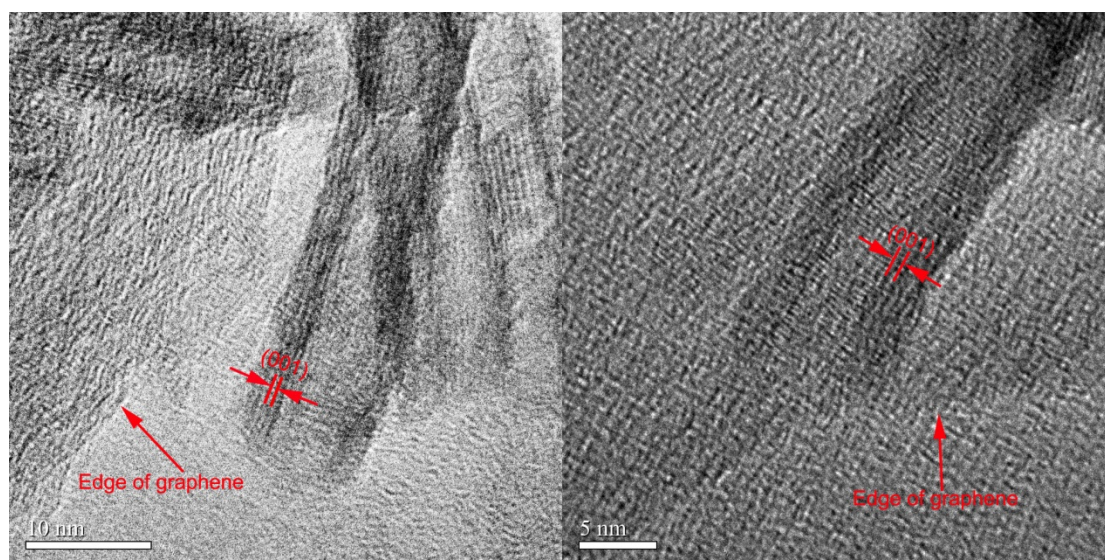

**Fig. S1** High resolution transmission electron microscopy of TiO<sub>2</sub>/graphene and N-doped TiO<sub>2</sub> nanotube/graphene nanosheets

\* Corresponding author: Dr. Yueming Li. Tel.: +86 3358 074631. Fax: +86 3358 074545. E-mail: liyueming@ysu.edu.cn; Dr. Xiao-Jun Lv. Tel.: +86-10-6255-4670 Email: xjlv@mail.ipc.ac.cn

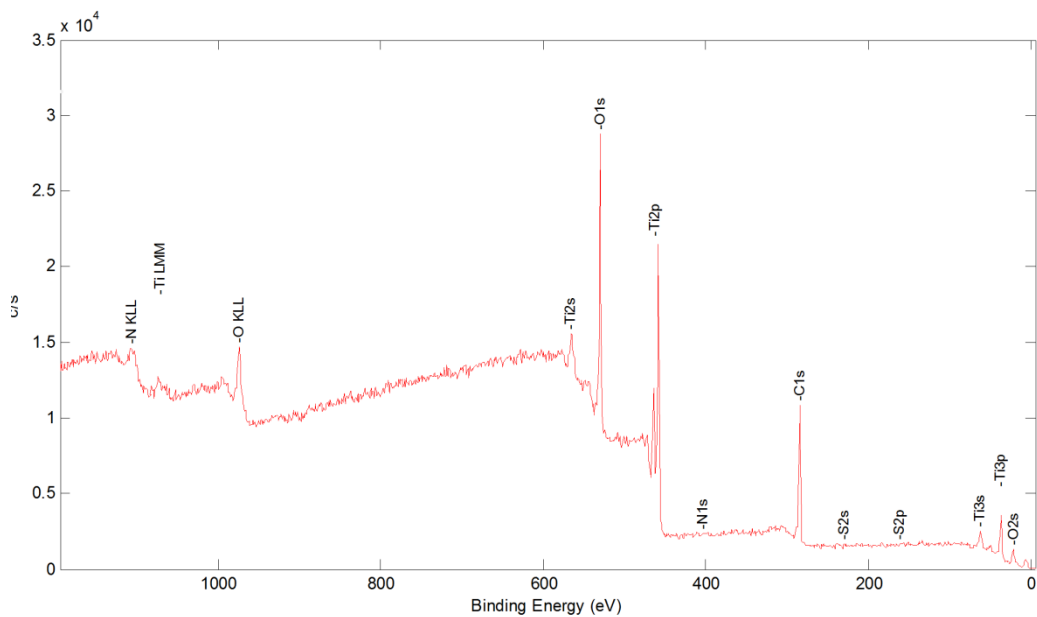

**Fig. S2** XPS survey spectrum of N-doped TiO<sub>2</sub>/ N-doped graphene nanosheets

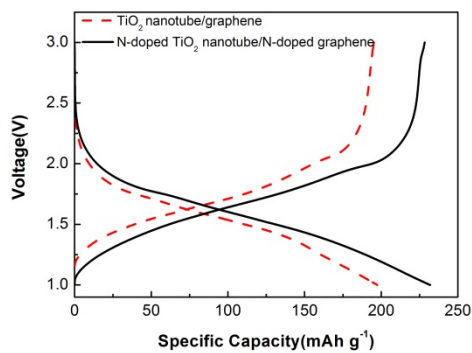

**Fig. S3** The 40<sup>th</sup> Charge-discharge curve of TiO<sub>2</sub> nanotube/graphene and N-doped TiO<sub>2</sub> nanotube/N-doped graphene nanocomposites at current density of 100 mA g<sup>-1</sup>
